# Supplementary material for: An ESIPT-based AIE fluorescent probe to visualize mitochondrial hydrogen peroxide and its application in living cells and rheumatoid arthritis
Source: Royal Society of Chemistry journal article supplement (doi:10.1039/d3ob00546a), 2023-01-01

## Supporting information

An ESIPT-based AIE fluorescent probe to visualize mitochondrial hydrogen peroxide  
and its application in living cells and rheumatoid arthritis

Shibo Zhong<sup>a,b</sup>, Shuai Huang<sup>a,b</sup>, Bin Feng<sup>a,b</sup>, Ting Luo<sup>a,b</sup>, Feiyi Chu<sup>a,b</sup>, Fan Zheng<sup>a,b</sup>,

Yingli Zhu<sup>a,b</sup>, Fei Chen<sup>a,b</sup>, Wenbin Zeng<sup>a,b\*</sup>

<sup>a</sup> *Xiangya School of Pharmaceutical Sciences, Central South University, Changsha 410013, China.*

<sup>b</sup> *Hunan Key Laboratory of Diagnostic and Therapeutic Drug Research for Chronic Diseases, Central South University, Changsha 410078, China.<sup>1</sup>*

---

\*Corresponding author

Email address: [wbzeng@hotmail.com](mailto:wbzeng@hotmail.com).

## Experimental section

### 2.1 Materials and apparatus

5-Bromosalicylaldehyde, 2-aminobenzenethiol and 4-bromomethylphenylboronic acid pinacol ester were purchased from Aladdin, Bidepharm or Energy Chemical Co., Ltd (Shanghai, China). All chemical reagents and solvents are analytically pure and do not require further purification. LysoTracker-Green and MitoTracker-Green were purchased from Beyotime. The general biochemical agents such as Dulbecco's modified eagle medium (DMEM), fetal bovine serum (FBS), lipopolysaccharide (LPS) and 3-(4,5-dimethylthiazol-2-yl)-2,5-diphenyltetrazolium bromide (MTT) were purchased from Sigma-Aldrich.  $^1\text{H}$  NMR and  $^{13}\text{C}$  NMR spectra were recorded on Bruker AVANCEIII 500M spectrometer (Rheinstetten, Germany) and Bruker AVANCEIII 400 MHz spectrometer (Rheinstetten, Germany). High-resolution mass spectroscopy (HRMS) was obtained on an Orbitrap Velos Pro LC-MS spectrometer (Thermo Scientific). UV-vis absorption spectra were measured on a Shimadzu UV-2450 UV-VIS spectrophotometer. Fluorescence spectra were measured with a HITACHI F-2700 fluorescence spectrophotometer (HITACHI, Japan). The absorbance was recorded with microplate reader SpectraMax M2 in the cytotoxicity experiment. Fluorescence images of cells were acquired on a Leica TCS SP8 laser scanning confocal microscope (Germany).

### 2.2 Synthesis of probe HTQ-R

#### Synthesis of HTO-CHO

Compound **2** (1000 mg, 3 mmol) and 4-(diphenylamino) phenylboronic acid (900 mg, 3 mmol) were dissolved in 10 ml anhydrous methanol and 5 ml anhydrous THF, then potassium carbonate (621 mg, 4.5 mmol) and Pd(dppf) $_2$ Cl $_2$  (30 mg) were added into the solution. After stirring for 6 h at 90 °C reflux under N $_2$  atmosphere, reaction mixture was rotary evaporated to remove the solvent and then purified by column chromatography on silica gel (PE: EA=30:1). 1048 mg of **HTO** as orange solid was obtained in 75% yield. **HTO** (1048 mg, yield 75%).  $^1\text{H}$  NMR (500 MHz, CDCl $_3$ )  $\delta$  10.56 (s, 1H), 8.38 (s, 1H), 8.12 (d,  $J$  = 2.3 Hz, 2H), 7.97 (d,  $J$  = 7.9 Hz, 1H), 7.57 (dd,  $J$  = 11.4, 4.1 Hz, 1H), 7.54 (d,  $J$  = 8.5 Hz, 2H), 7.48 (dd,  $J$  = 11.2, 4.0 Hz, 1H), 7.29 (t,  $J$  = 7.9 Hz, 4H), 7.18 (d,  $J$  = 8.6 Hz, 2H), 7.15 (d,  $J$  = 7.6 Hz, 4H), 7.06 (t,  $J$  = 7.3 Hz, 2H).  $^{13}\text{C}$  NMR (125 MHz, CDCl $_3$ )  $\delta$  190.48, 173.42, 159.50, 152.16, 151.47, 147.62, 147.54, 135.89, 132.52, 132.49, 132.32, 131.18, 129.39, 127.42, 126.99, 126.01, 124.81, 124.58, 123.82, 123.20, 122.46, 121.66. HRMS: calcd for  $[\text{M}+\text{H}]^+$ : 499.1479; found: 499.1454.

#### Synthesis of HTQ

**HTO-CHO** (500 mg, 1 mmol) and p-toluenesulfonic acid (475 mg, 2.5 mmol) were dissolved in 15 ml DMF, then 4-methylquinoline (214 mg, 1.5 mmol) was added into the solution. After stirring for 10 h at 120 °C reflux under N $_2$  atmosphere, the reaction

was quenched by water and then extracted thrice with dichloromethane. The organic layers were combined, washed with water, dried over anhydrous potassium carbonate and rotary evaporated. The residue was purified by column chromatography on silica gel (PE: EA=15:1) to afford **HTQ** (498 mg) as red oil in 80% yield. **HTQ** (498 mg, yield 80%). <sup>1</sup>H NMR (500 MHz, CDCl<sub>3</sub>) δ 13.37 (s, 1H), 8.89 (d, J = 4.6 Hz, 1H), 8.27 (d, J = 8.2 Hz, 1H), 8.14 (d, J = 8.3 Hz, 1H), 8.10 (d, J = 16.2 Hz, 1H), 8.00 (d, J = 8.1 Hz, 1H), 7.91 – 7.88 (m, 2H), 7.80 (dd, J = 11.5, 9.2 Hz, 2H), 7.75 – 7.70 (m, 1H), 7.68 (d, J = 4.6 Hz, 1H), 7.61 – 7.56 (m, 1H), 7.54 – 7.49 (m, 3H), 7.44 – 7.40 (m, 1H), 7.29 (t, J = 7.9 Hz, 4H), 7.20 (d, J = 8.5 Hz, 2H), 7.16 (d, J = 7.6 Hz, 4H), 7.06 (t, J = 7.3 Hz, 2H). <sup>13</sup>C NMR (500 MHz, CDCl<sub>3</sub>) δ 169.27, 155.52, 151.58, 150.07, 148.51, 147.64, 147.33, 143.62, 133.76, 132.63, 132.43, 130.01, 129.90, 129.38, 129.14, 127.52, 126.90, 126.62, 126.53, 126.48, 125.99, 125.84, 124.48, 124.37, 124.04, 123.66, 123.11, 122.24, 121.60, 117.42, 117.01. HRMS: calcd for [M+H]<sup>+</sup>: 624.2031; found: 624.20795.

### Synthesis of **HTQ-R**

4-bromomethylphenylboronic acid pinacol ester (297 mg, 1mmol) was added to **HTQ** (300 mg, 0.5 mmol) in 13 ml acetonitrile, reaction was carried on at 90 °C reflux under N<sub>2</sub> atmosphere. After stirring for 4 h, the reaction was quenched and mixture was rotary evaporated to remove the solvent. The residue was purified by column chromatography on silica gel (DCM: MeOH=10:1). 417 mg of **HTQ-R** as black solid was obtained in 50% in yield. <sup>1</sup>H NMR (500 MHz, CDCl<sub>3</sub>) δ 10.18 (d, J = 6.3 Hz, 1H), 8.57 (d, J = 8.4 Hz, 1H), 8.40 (dd, J = 11.2, 4.5 Hz, 2H), 8.13 (dd, J = 22.6, 12.4 Hz, 3H), 7.97 (d, J = 8.1 Hz, 1H), 7.87 (d, J = 7.9 Hz, 1H), 7.75 (d, J = 8.1 Hz, 2H), 7.49 (dd, J = 15.6, 8.0 Hz, 4H), 7.42 – 7.35 (m, 2H), 7.31 – 7.27 (m, 5H), 7.25 (s, 1H), 7.18 (d, J = 8.6 Hz, 2H), 7.15 (d, J = 7.7 Hz, 4H), 7.06 (t, J = 7.3 Hz, 2H), 6.75 (d, J = 8.2 Hz, 1H), 5.29 (s, 2H), 1.30 (s, 12H). <sup>13</sup>C NMR (500 MHz, CDCl<sub>3</sub>) δ 168.76, 156.87, 154.50, 152.31, 151.25, 149.23, 147.56, 147.51, 142.38, 139.94, 138.18, 136.17, 135.76, 135.06, 132.67, 132.51, 132.46, 132.05, 129.41, 127.44, 127.28, 127.06, 126.21, 126.06, 124.63, 124.24, 123.86, 123.74, 123.47, 123.24, 122.26, 121.65, 119.43, 117.73, 116.86, 116.05, 84.04, 53.47, 24.84. HRMS: calcd for [M+H]<sup>+</sup>: 840.3426; found: 840.04106.

### 2.5 Cell culture and imaging

HeLa cells were cultured at 37 °C in a DMEM high-glycemic medium containing 10% (V/V) fetal bovine serum. The HeLa cells were divided into four groups. The first group of cells were only incubated with **HTQ-R** (10 μM). The exogenous H<sub>2</sub>O<sub>2</sub> imaging group of cells were treated with H<sub>2</sub>O<sub>2</sub> (20, 40, 60 μM) for 30 min, then incubated with **HTQ-R** (10 μM) for another 30 min. The endogenous H<sub>2</sub>O<sub>2</sub> imaging group of cells were treated with LPS (10 μg/mL in PBS) and **HTQ-R** (10 μM) for 20, 40, 60 min. The negative control group of cells were incubated with NAC (1 mM) for 30 min followed by LPS (10 μg/mL in PBS) stimulation, after that cells were incubated with **HTQ-R** (10 μM) for another 30 min. The cells were washed for three times with PBS before imaging, Leica TCS SP8 (MP+X) confocal laser scanning microscope (Leica, Germany), objective lens 40 times (excitation wavelength 405 nm) is used to collect

fluorescence signals. Red channels were collected at 600-650 nm ( $\lambda_{\text{ex}} = 405$  nm) and green channels were at 510-550 nm ( $\lambda_{\text{ex}} = 488$  nm).

### Synthesis

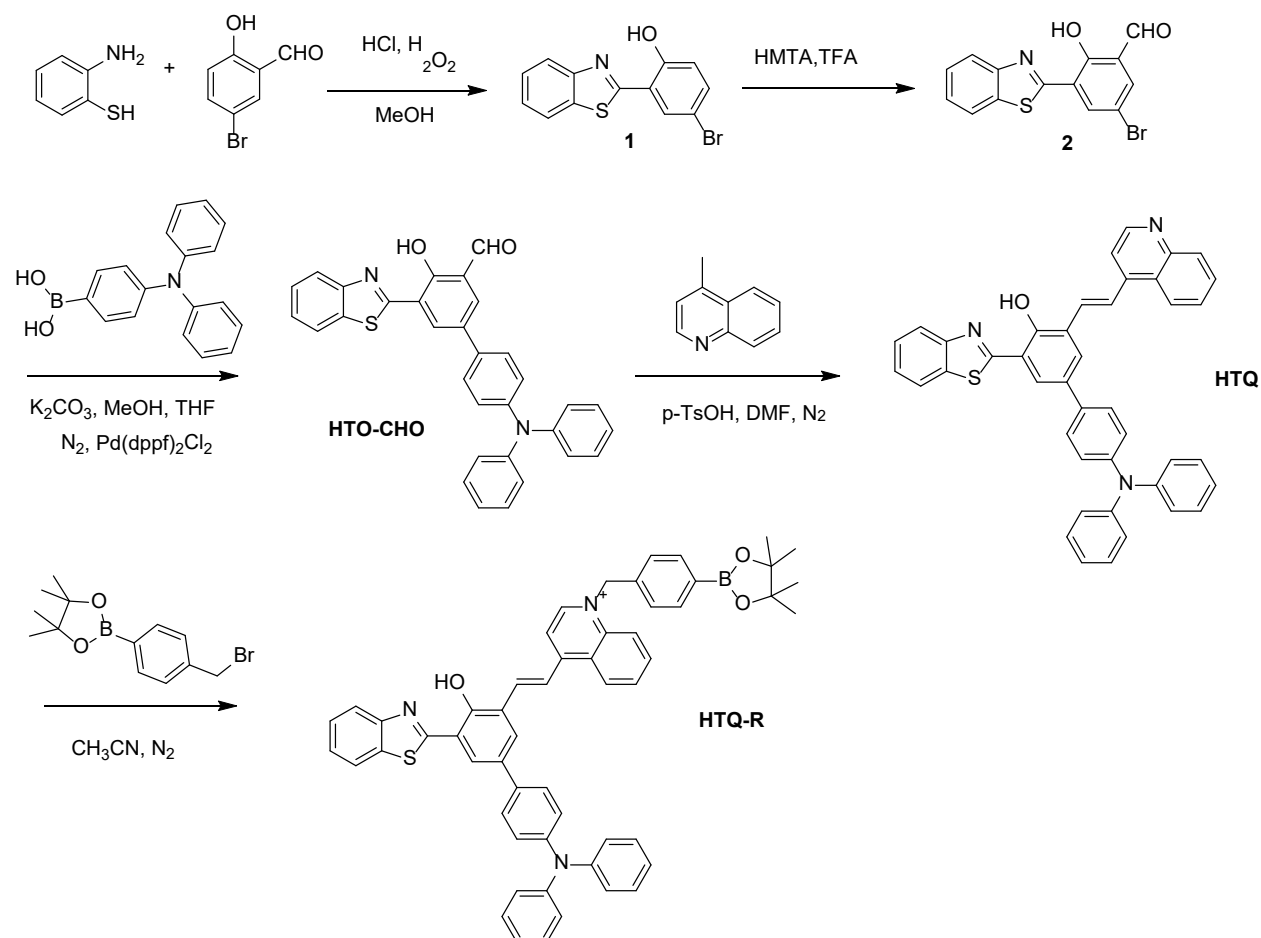

**Scheme S1. Synthesis route of probe HTQ-R.**

| Structure                                                                           | Mechanism                   | Response mode | $\lambda_{ex}/\lambda_{em}$                          | LOD          |
|-------------------------------------------------------------------------------------|-----------------------------|---------------|------------------------------------------------------|--------------|
| 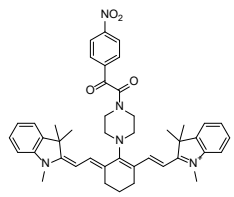   | PET                         | Turn on       | $\lambda_{ex}=730$<br>nm<br>$\lambda_{em}=790$<br>nm | 65 nM        |
|    | ICT                         | Turn on       | $\lambda_{ex}=487$<br>nm<br>$\lambda_{em}=653$<br>nm | 5300 $\mu$ M |
|    | Payne Dakin tandem reaction | Turn on       | $\lambda_{ex}=450$<br>nm<br>$\lambda_{em}=502$<br>nm | 31nM         |
|   | ESIPT                       | Ratiometric   | $\lambda_{ex}=422$<br>nm<br>$\lambda_{em}=656$<br>nm | 40.2 nM      |
|  | ICT                         | Turn on       | $\lambda_{ex}=524$<br>nm<br>$\lambda_{em}=572$<br>nm | 87 nM        |
|  | ESIPT                       | Ratiometric   | $\lambda_{ex}=373$<br>nm<br>$\lambda_{em}=669$<br>nm | 590 nM       |
|  | TICT                        | Turn on       | $\lambda_{ex}=514$<br>nm<br>$\lambda_{em}=660$<br>nm | 2010 nM      |
|  | FRET                        | Ratiometric   | $\lambda_{ex}=526$<br>nm<br>$\lambda_{em}=630$<br>nm | 400 nM       |
|  | FRET                        | Ratiometric   | $\lambda_{ex}=445$<br>nm<br>$\lambda_{em}=545$<br>nm | 260 nM       |

**Table S1** An overview for reported optical probes for sensing H<sub>2</sub>O<sub>2</sub>.

## Figures

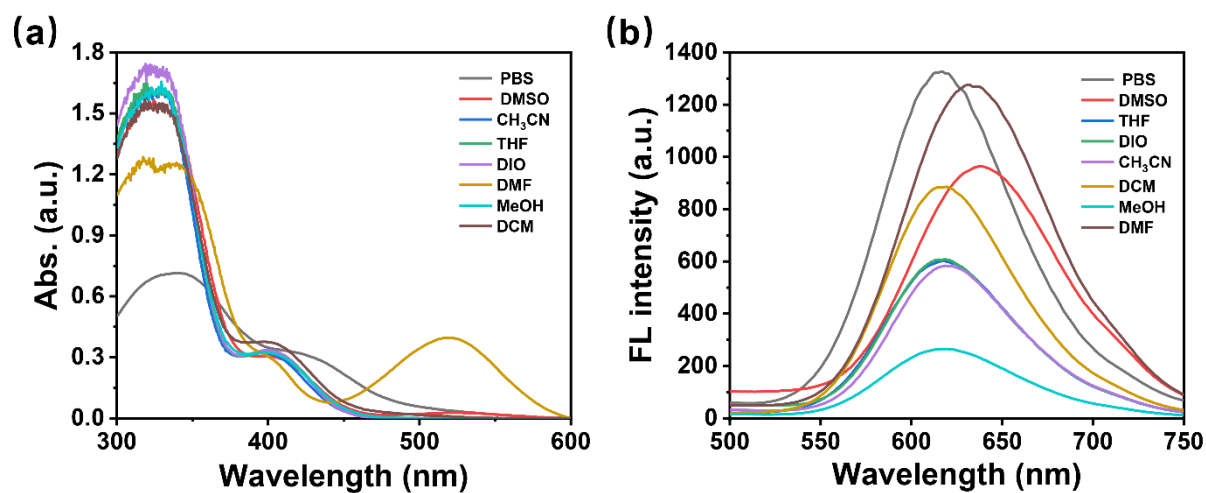

Fig.S1. (a) UV spectra of HTQ (10 μM) and (b) fluorescence spectra of HTQ (10 μM)

in eight different solvents at room temperature.  $\lambda_{ex} = 400$  nm.

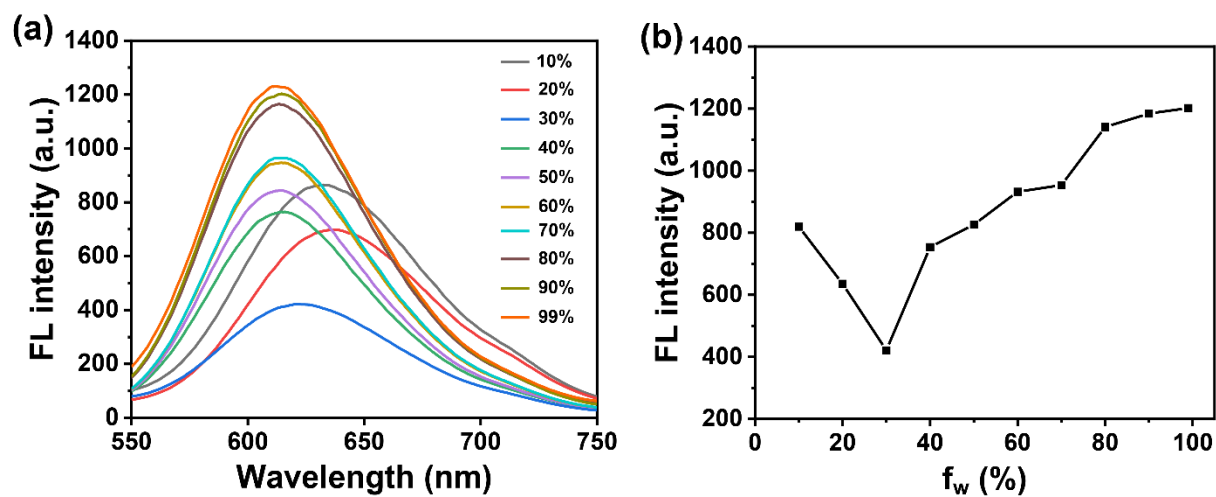

Fig.S2. Fluorescence spectra of HTQ (10 μM) in DMSO/H<sub>2</sub>O system at room

temperature.  $\lambda_{ex} = 400$  nm.

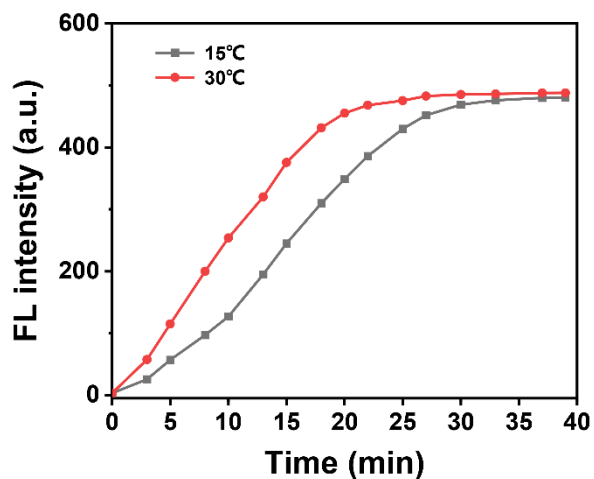

**Fig.S3.** Time-dependent fluorescence intensities of **HTQ-R** (10  $\mu$ M) at 620 nm toward  $\text{H}_2\text{O}_2$  (50  $\mu$ M) at 15  $^\circ\text{C}$  and 30  $^\circ\text{C}$  respectively.

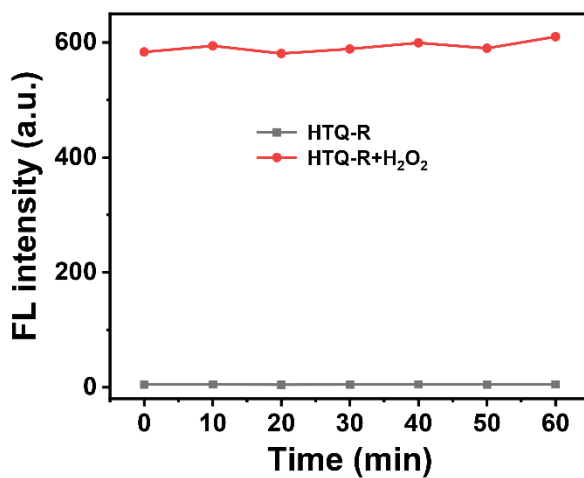

**Fig.S4.** Photostability of the **HTQ-R** (10  $\mu$ M) in the absence and presence of  $\text{H}_2\text{O}_2$  (50  $\mu$ M) under ambient light illumination over a period of 60 min at ambient temperature.

$$\lambda_{\text{ex}} / \lambda_{\text{em}} = 400 / 620 \text{ nm.}$$

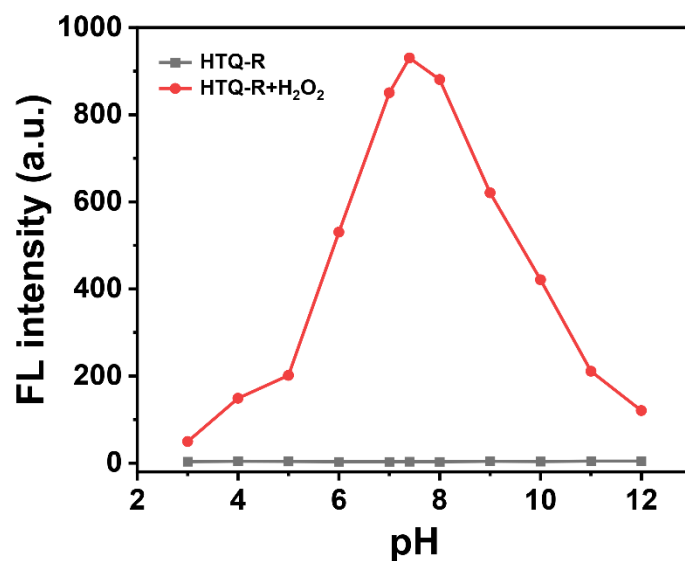

**Fig.S5.** Fluorescence intensity of **HTQ-R** (10  $\mu$ M) in the absence and presence of **H<sub>2</sub>O<sub>2</sub>** (100  $\mu$ M) at different pH.

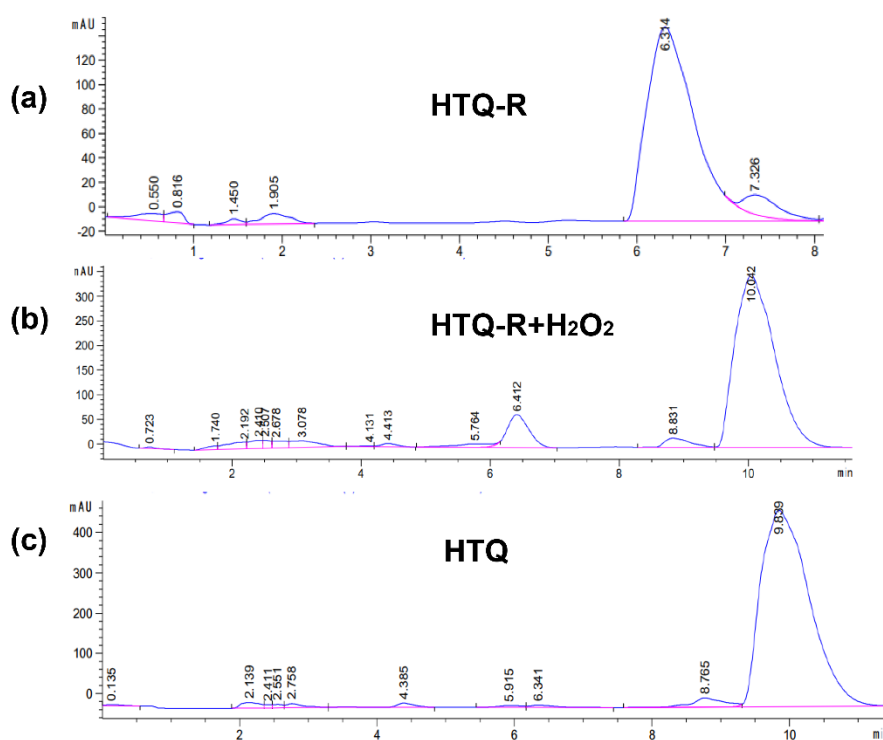

**Fig.S6.** HPLC traces of **HTQ-R**, **HTQ-R** incubated with **H<sub>2</sub>O<sub>2</sub>**, **HTQ**. The mixture of **HTQ-R** (10  $\mu$ M) and **H<sub>2</sub>O<sub>2</sub>** (50  $\mu$ M) was incubated for 20 min at 37  $^{\circ}$ C.



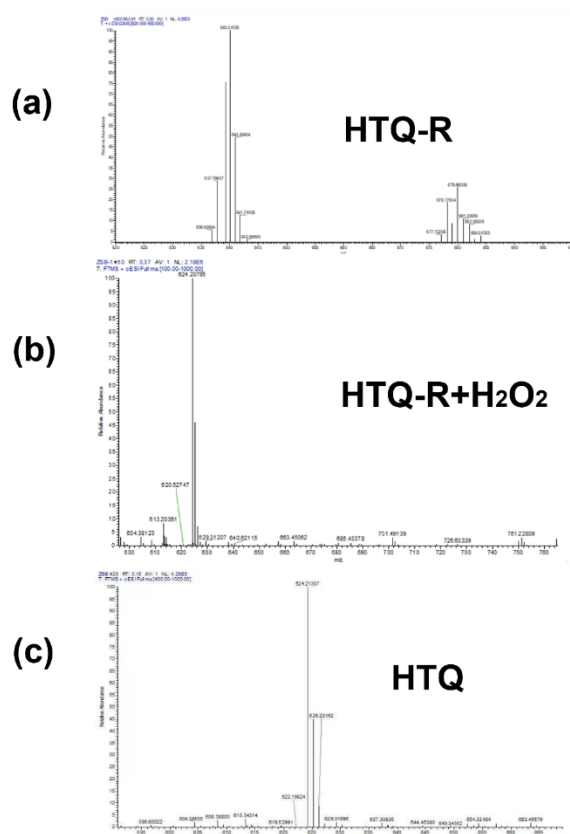

**Fig.S7.** HRMS analyses of (a) **HTQ-R**, (b) **HTQ-R** incubated with H<sub>2</sub>O<sub>2</sub>, and (c) **HTQ**. The mixture of **HTQ-R** (10 μM) and H<sub>2</sub>O<sub>2</sub> (50 μM) was incubated for 20 min at 37 °C. The peak at  $m/z = 840.04108$  can be characterized by **HTQ-R**. The peak at  $m/z = 624.20795$  and  $624.21307$  can be characterized by **HTQ**.

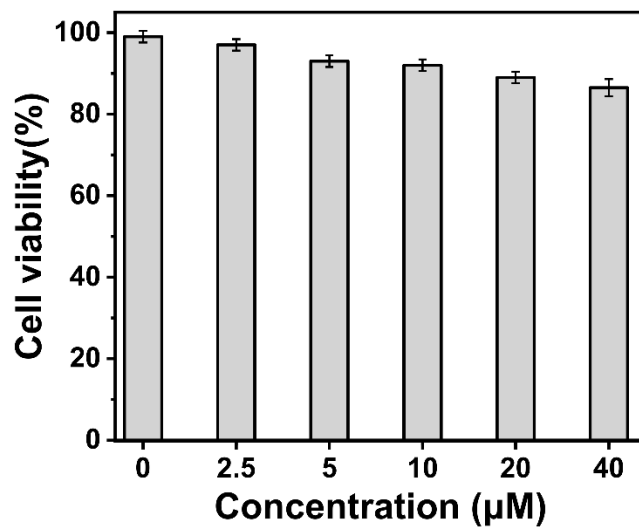

**Fig.S8.** Cell viability values (%) estimated by MTT proliferation test versus concentrations of **HTQ-R**. HeLa cells were cultured in the presence of 0-40 µM **HTQ-R**.

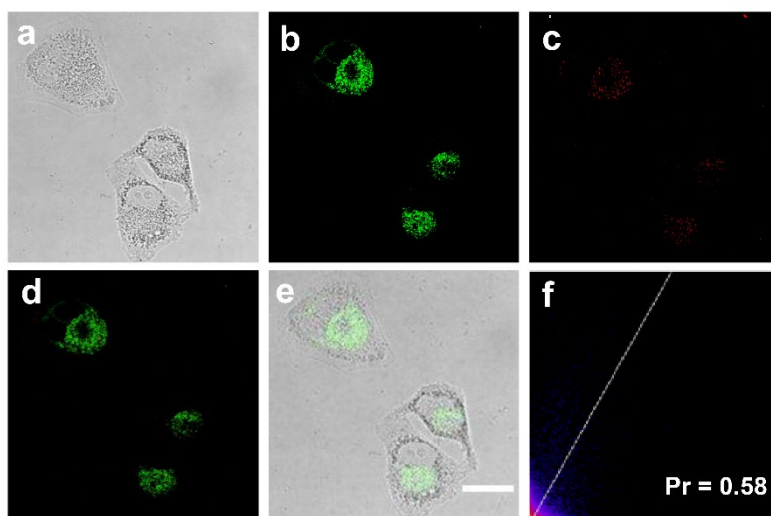

**Fig.S9.** Colocalization images of HeLa cells co-stained with **HTQ-R** (10 µM) (pretreated with 50 µM  $H_2O_2$  for 30 min) and LysoTracker-Green (1 µM). (a) Bright field. (b) Green fluorescence of LysoTracker-Green. (c) Red fluorescence of **HTQ-R**. (d) Merge of (b) and (c). (e) Merge of (a) and (d). (f) Intensity scatter plot. The red fluorescence signal was collected at 600-650 nm ( $\lambda_{ex} = 405$  nm) and the green

fluorescence was collected at 510-550 nm ( $\lambda_{ex} = 488$  nm). Scale bar = 10  $\mu$ m.

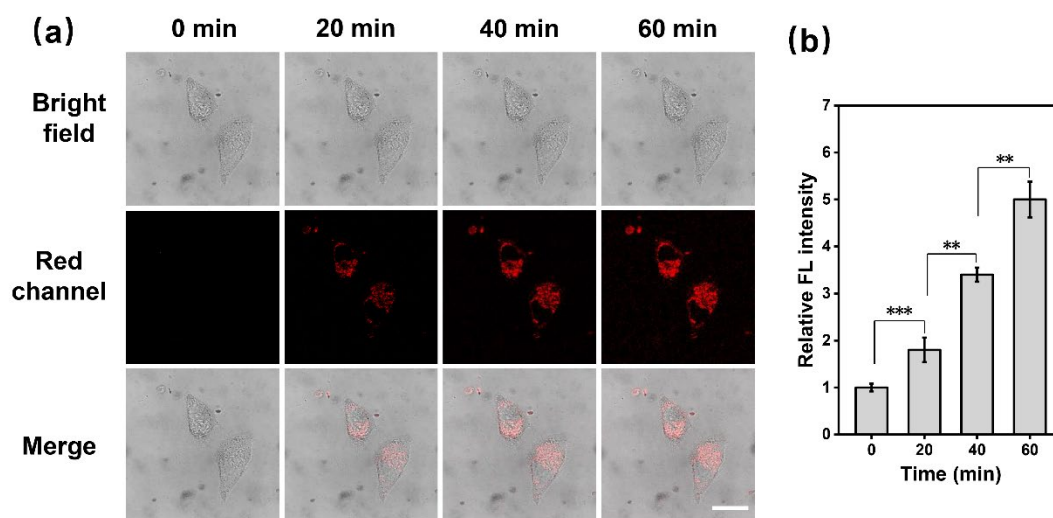

**Fig.S10.** Fluorescence imaging of endogenous H<sub>2</sub>O<sub>2</sub> in HeLa cells. (a) HeLa cells were incubated with 0 min, 20 min, 40 min, 60 min LPS (10  $\mu$ g / mL) and **HTQ-R** (10  $\mu$ M). (b) Relative fluorescence intensity of (a).  $\lambda_{ex} = 405$  nm,  $\lambda_{em} = 600$ -650 nm. Statistical significance was defined as  $p < 0.01$  (\*\*),  $p < 0.001$  (\*\*\*). Scale bar = 10  $\mu$ m.

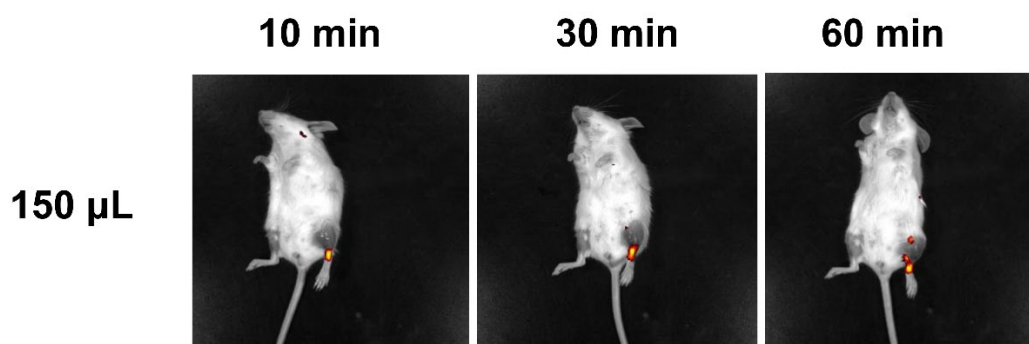

**Fig.S11.** Balb/C mice were subcutaneously injected with 150  $\mu$ L  $\lambda$ -carrageenan (5 mg/mL) into the left joints, and an equal amount of PBS into the right joints. After 4 h, both legs were injected with **HTQ-R** (100  $\mu$ M, 100  $\mu$ L) for different periods (10 min, 30 min, 60 min).

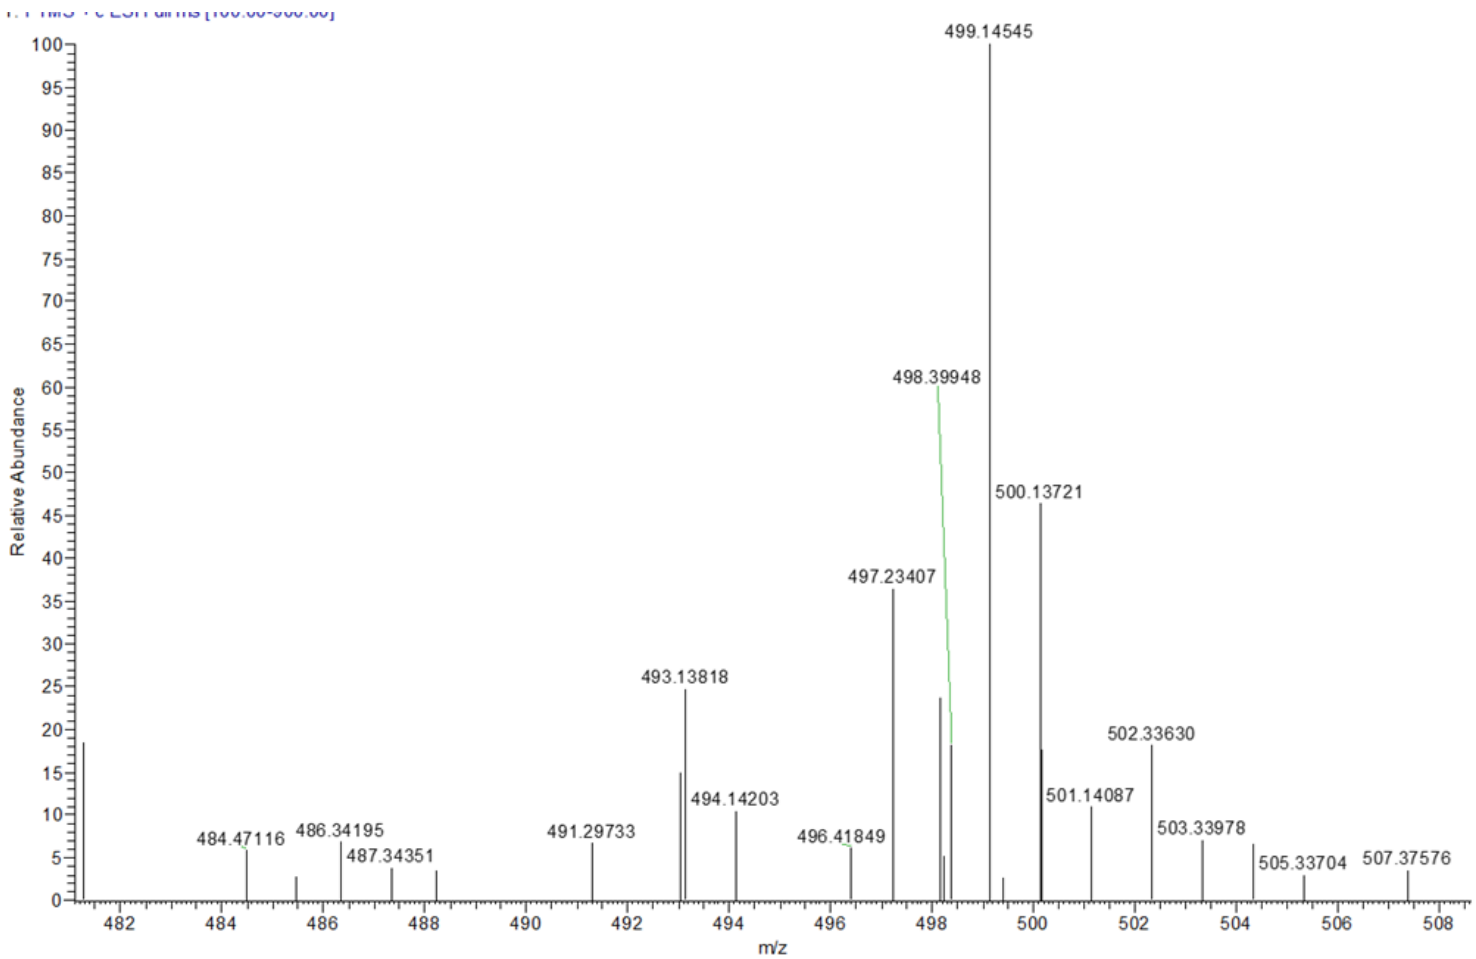

**Fig.S12.** HRMS spectrum of HTO-CHO.

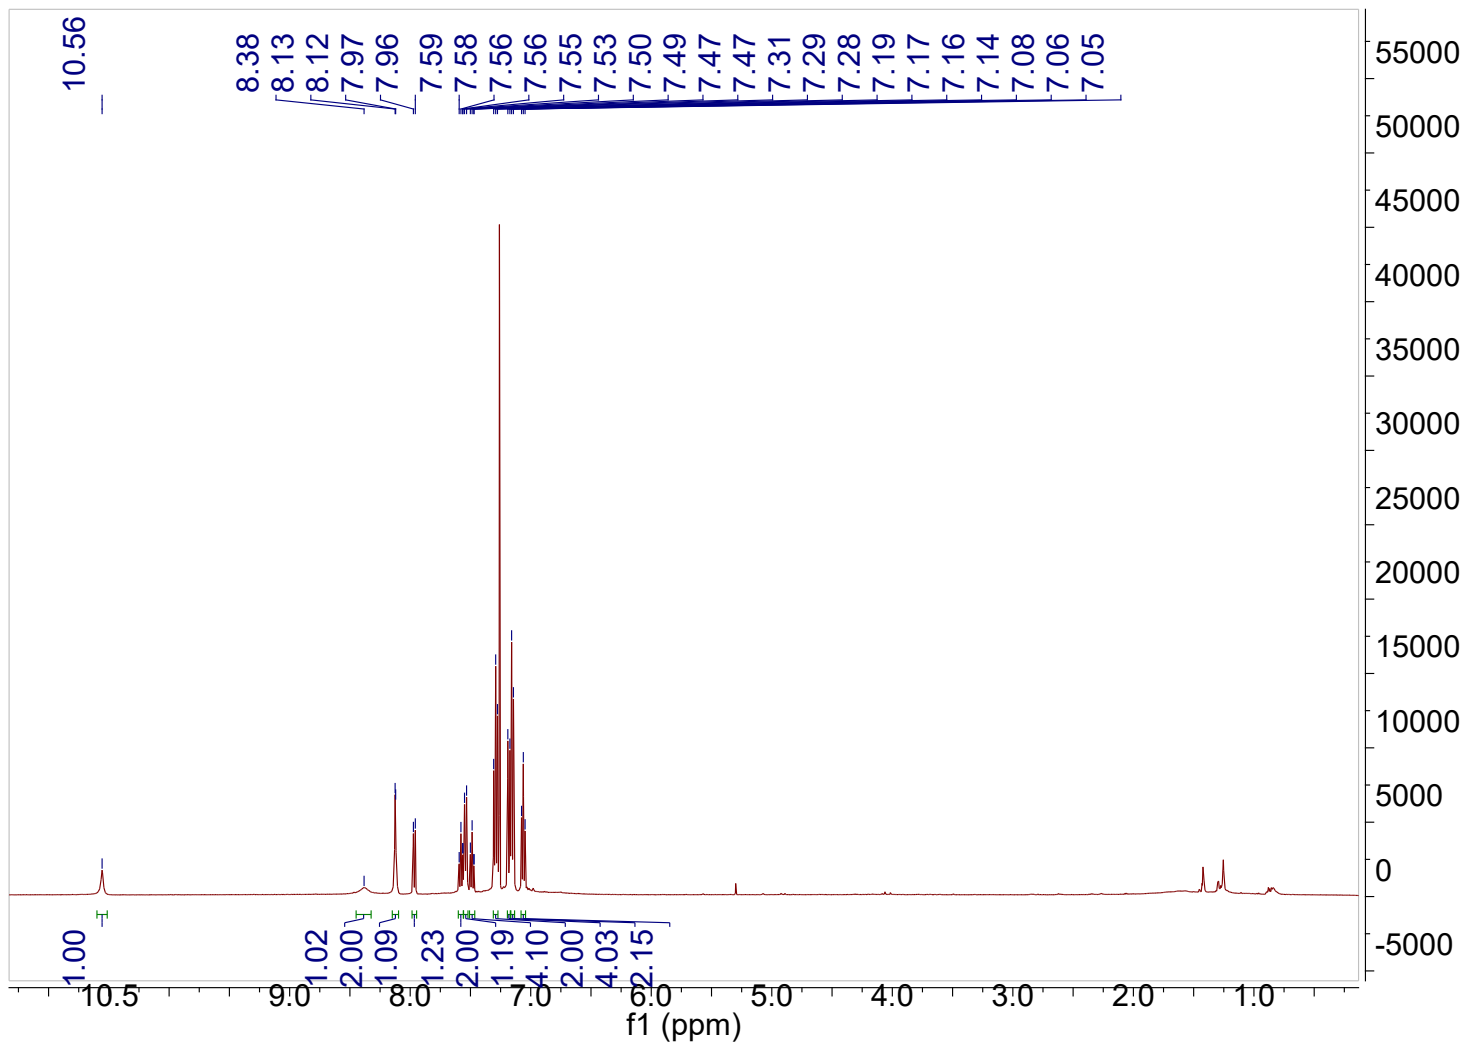

Fig.S13. <sup>1</sup>H-NMR spectrum of HTO-CHO in CDCl<sub>3</sub>.

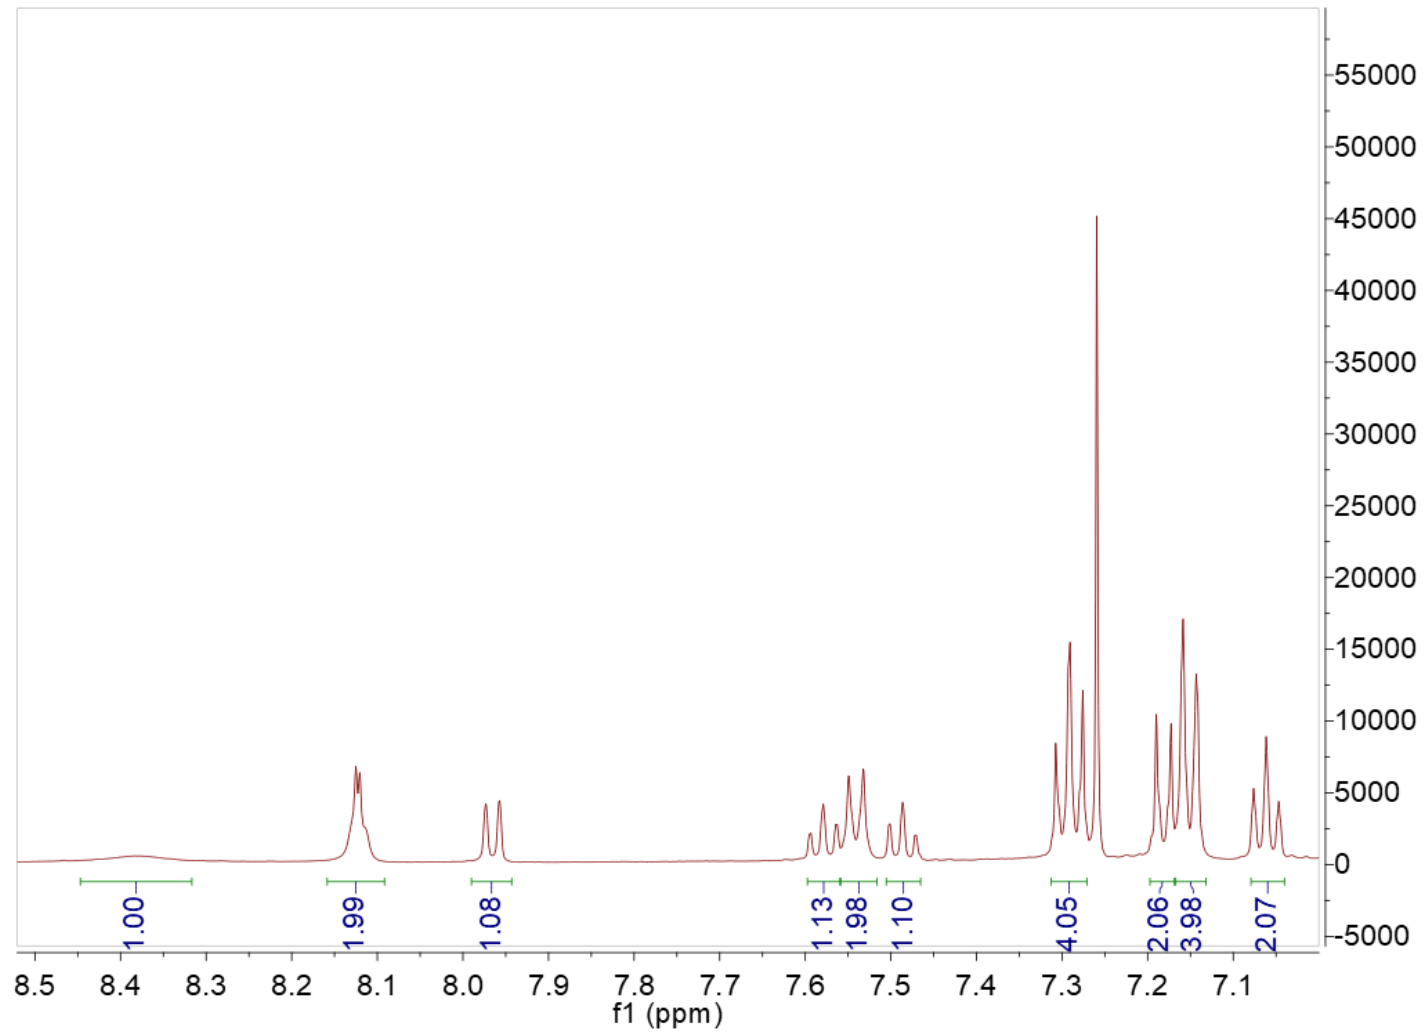

**Fig.S14.** The expanded <sup>1</sup>H-NMR spectrum of HTO-CHO in CDCl<sub>3</sub>.

**Fig.S15.**  $^{13}\text{C}$ -NMR spectrum of **HTO-CHO** in  $\text{CDCl}_3$ .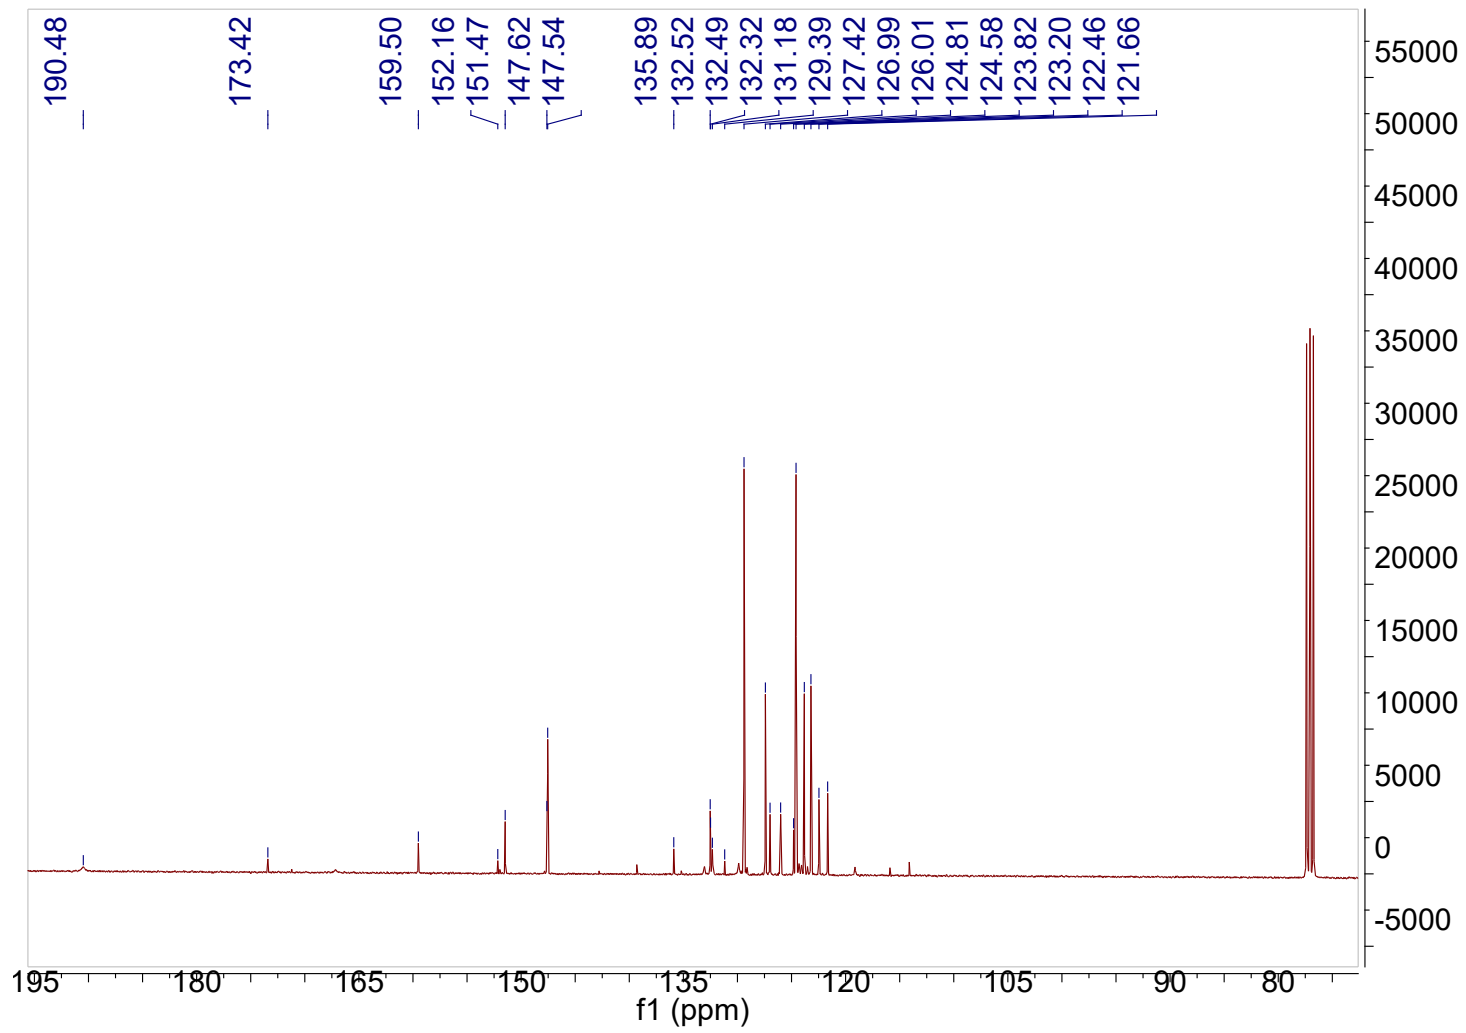

ZSB-1#50 RT: 0.37 AV: 1 NL: 2.18E8  
T: FTMS + cESI Full ms [100.00-1000.00]

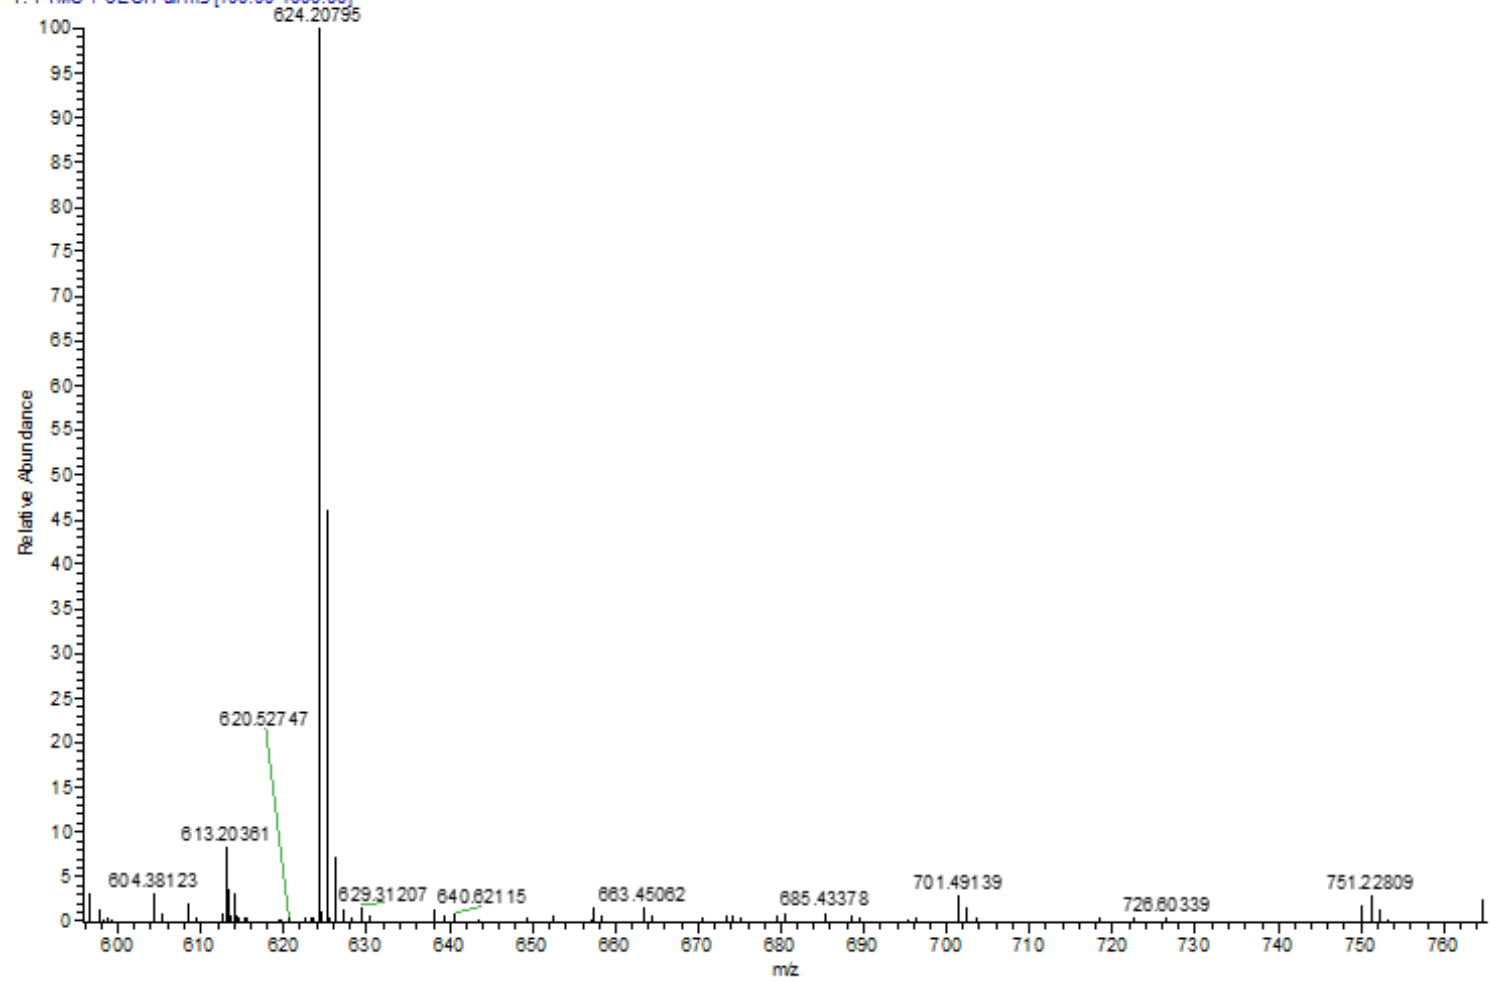

Fig.S16. HRMS spectrum of HTQ.



Fig.S17. <sup>1</sup>H-NMR spectrum of HTQ in CDCl<sub>3</sub>.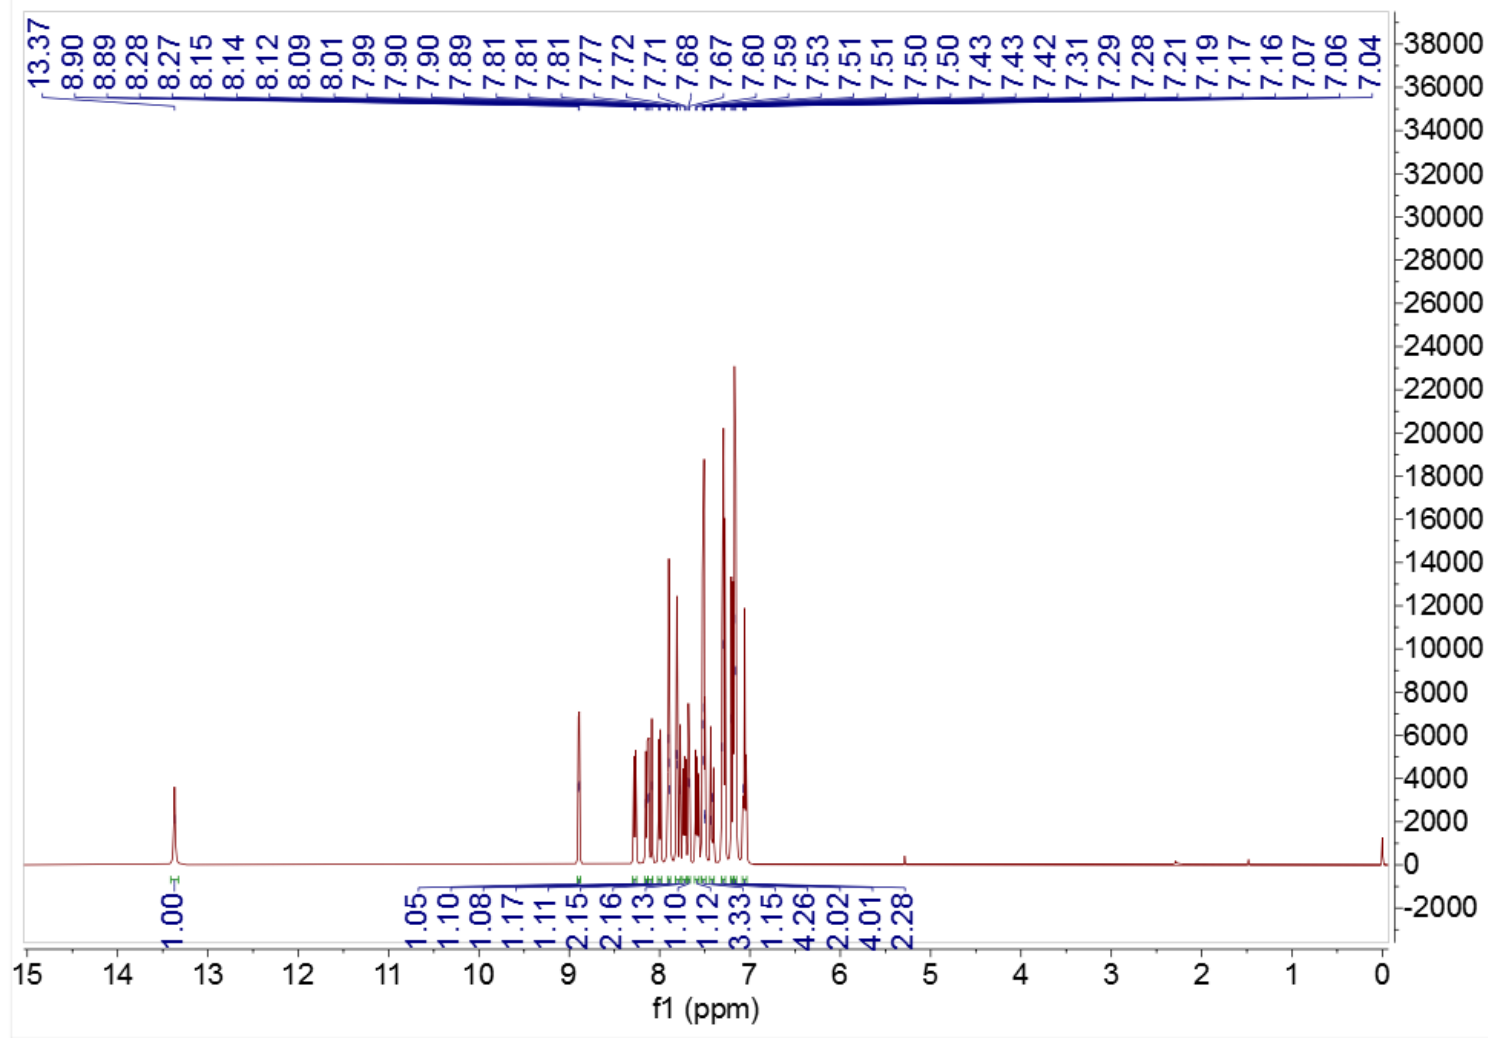

**Fig.S18.** The expanding  $^1\text{H-NMR}$  spectrum of **HTQ** in  $\text{CDCl}_3$ .

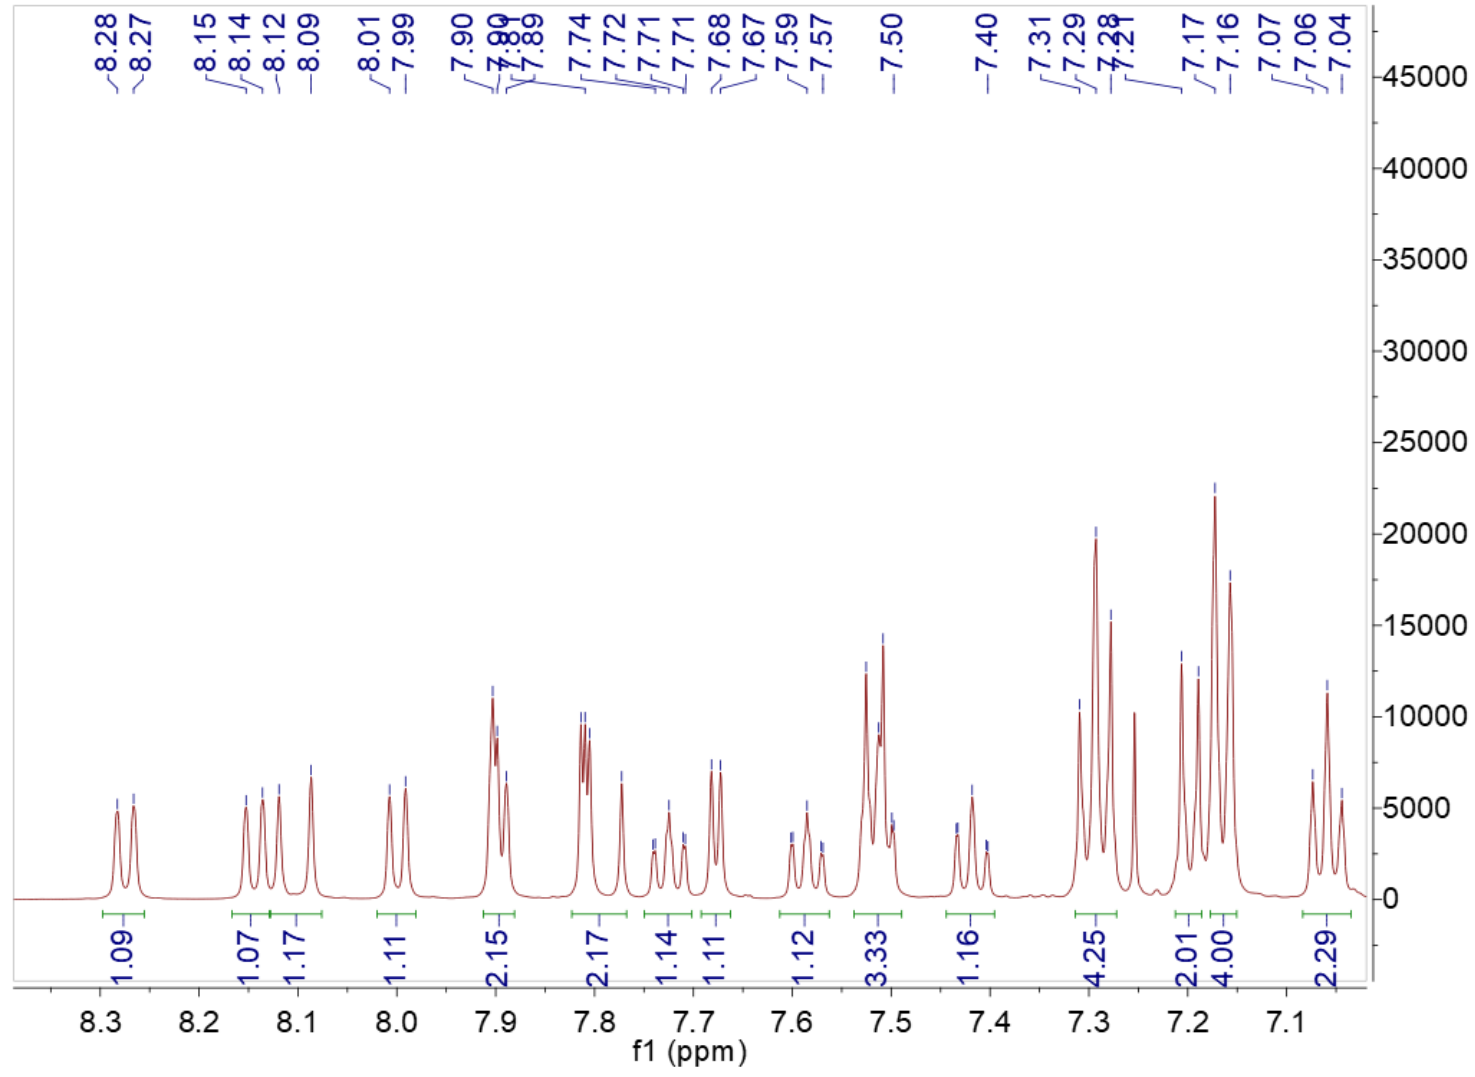

**Fig.S19.**  $^{13}\text{C}$ -NMR of HTQ in  $\text{CDCl}_3$ .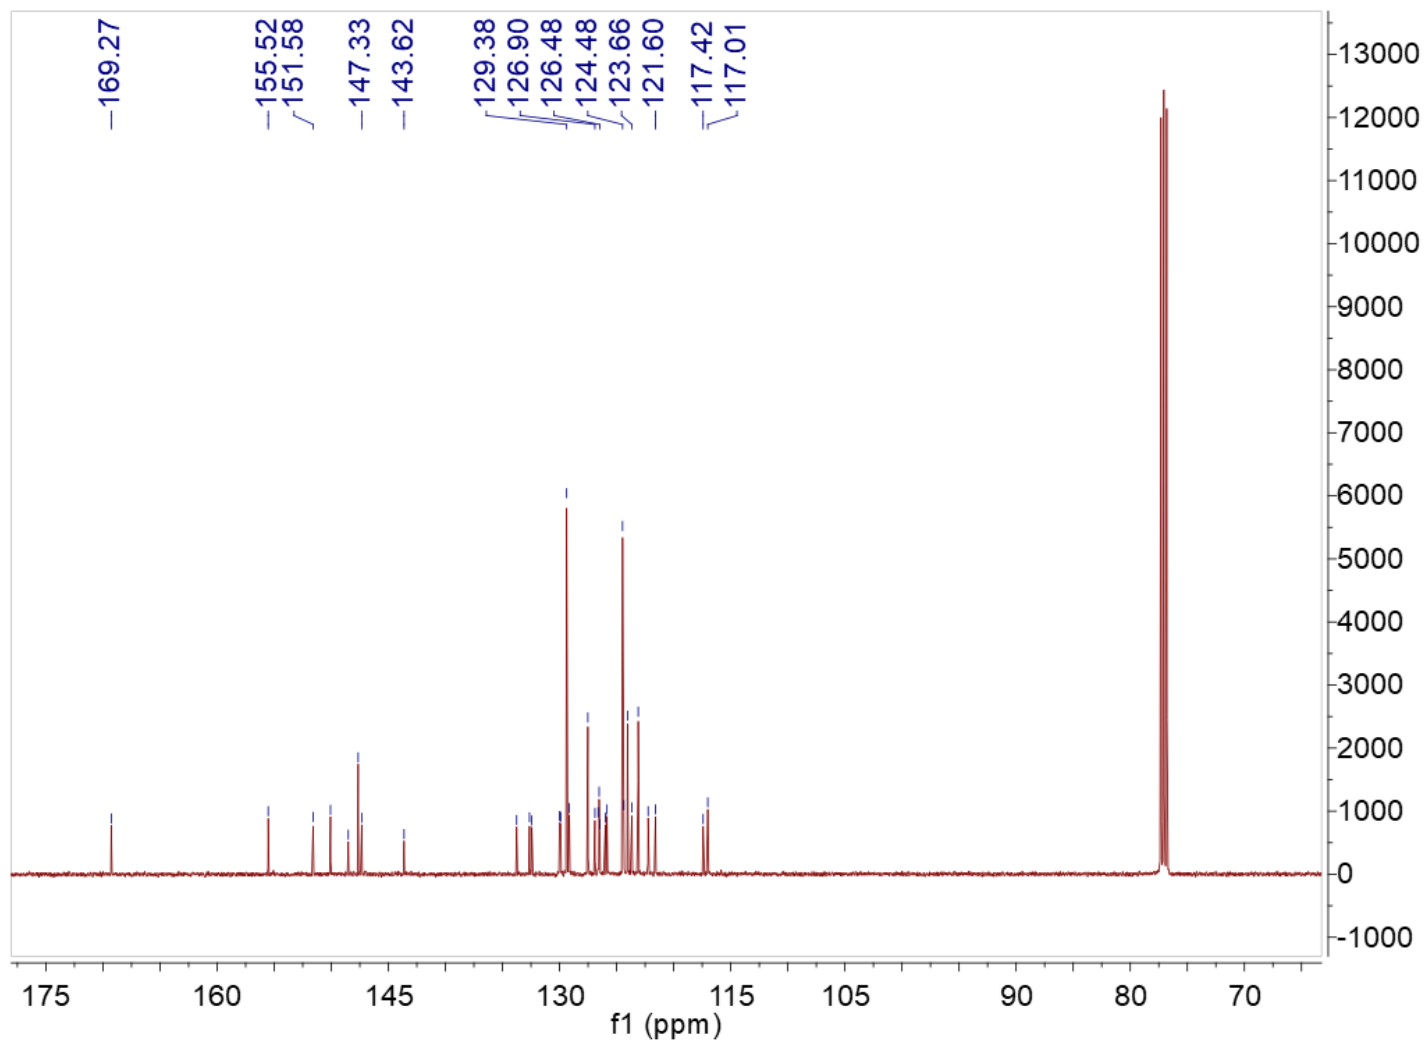

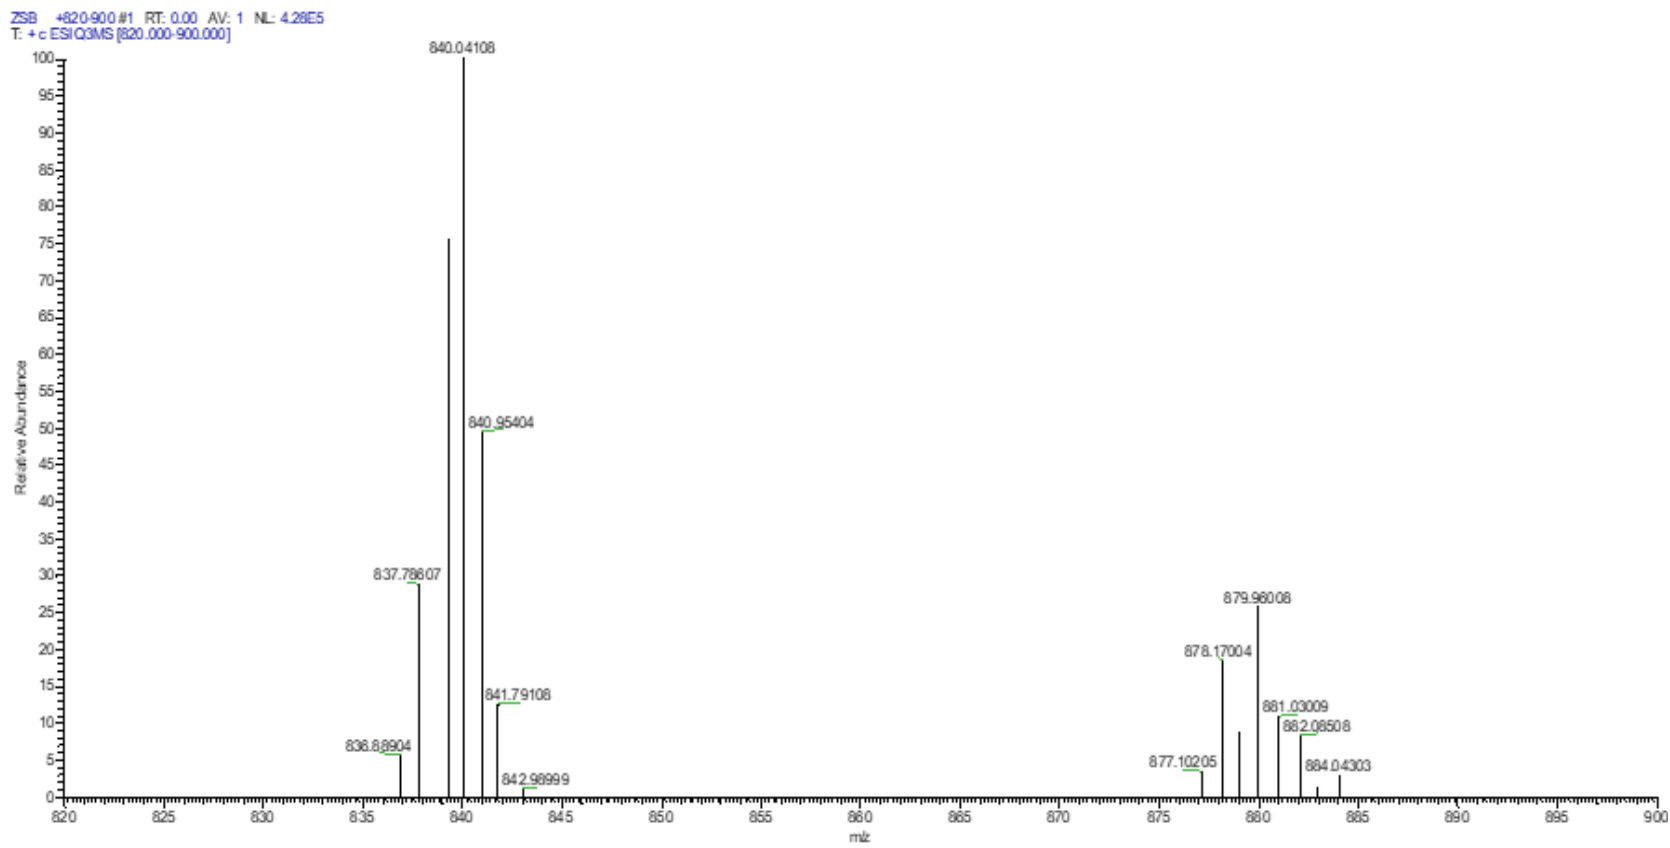

Fig.S20. HRMS spectrum of HTQ-R.

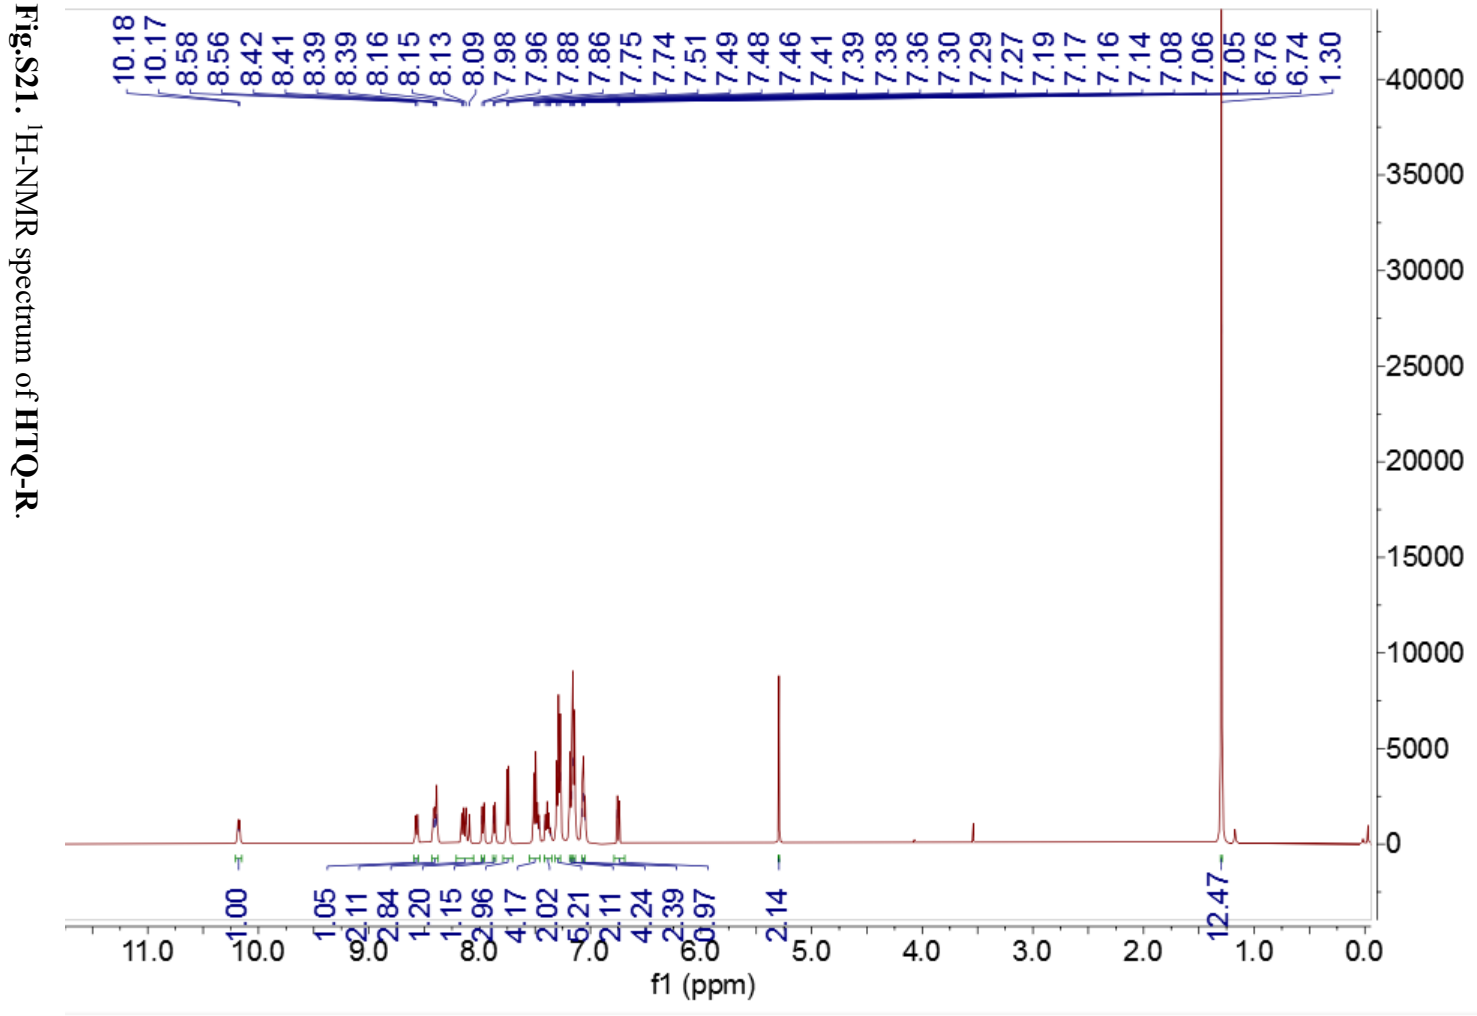

Fig.S21.  $^1\text{H-NMR}$  spectrum of HTQ-R.

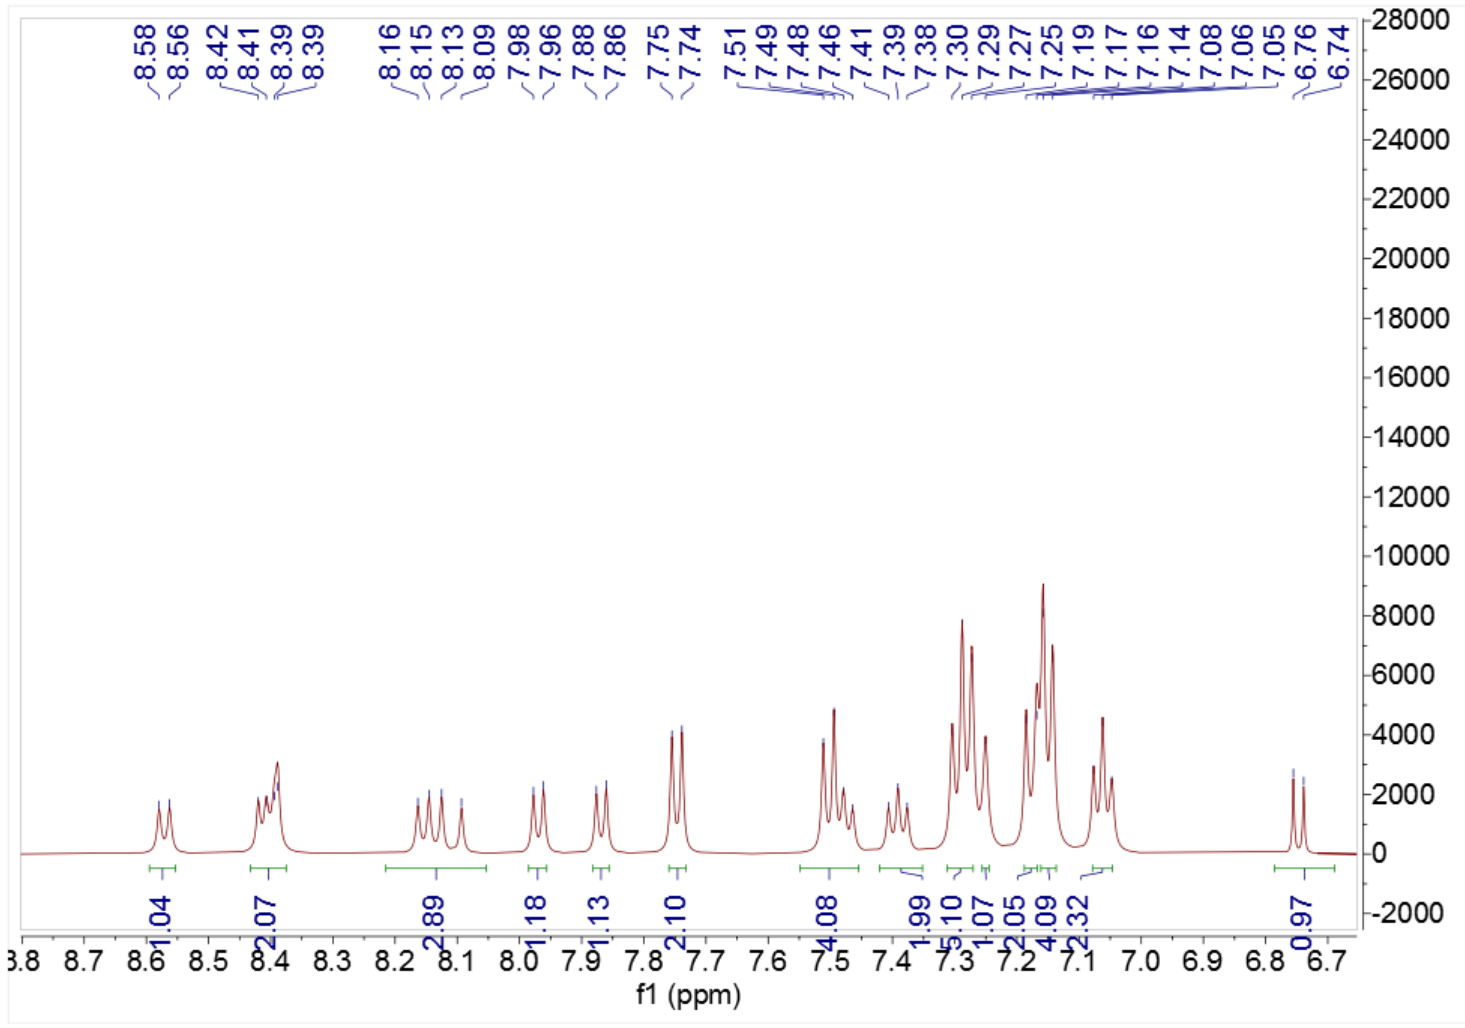

**Fig.S22.** The expanding <sup>1</sup>H-NMR spectrum of HTQ-R.

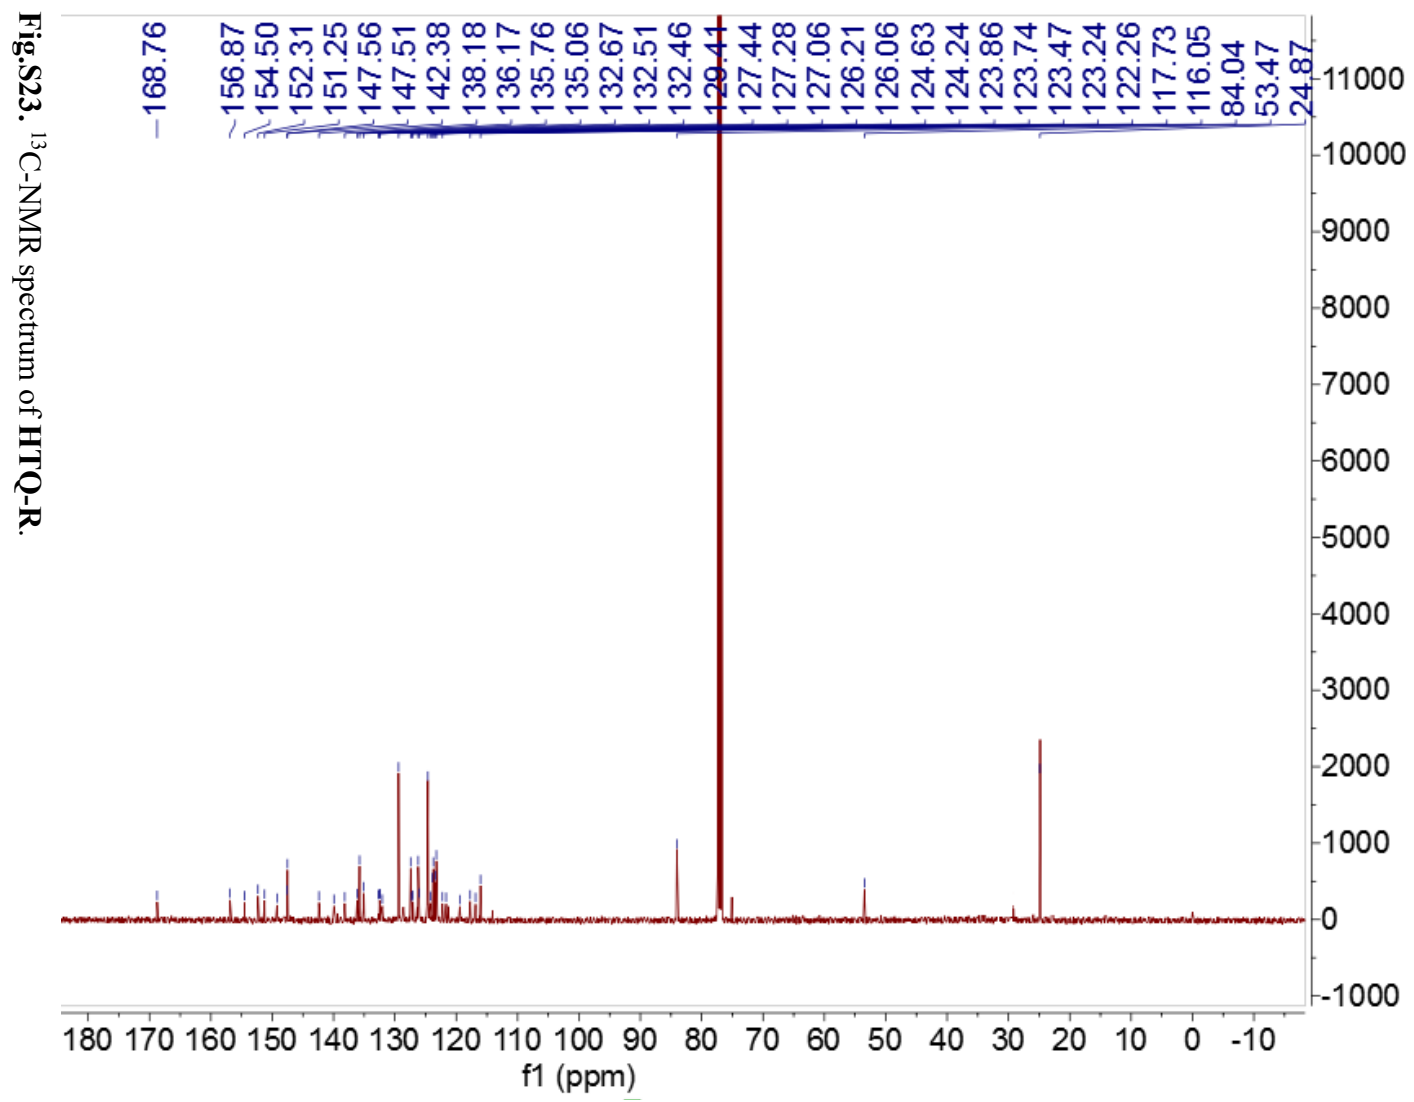

Supplement: d3ob00546a1.pdf [file d3ob00546a1.pdf]
